# Supplementary material for: A self-healable, stretchable, tear-resistant and sticky elastomer enabled by a facile polymer blends strategy
Source: Royal Society of Chemistry journal article supplement (doi:10.1039/d0ta11497a), 2021-01-01
Supplement: d0ta11497a1.pdf [file d0ta11497a1.pdf]

## Supporting Information

### **A Self-Healable, Stretchable, Tear-resistant and Sticky Elastomer Enabled by Facile Polymer Blends Strategy**

*Shiqiang Song,<sup>\*a</sup> Honghao Hou,<sup>b</sup> Jincheng Wang,<sup>\*a</sup> Pinhua Rao,<sup>a</sup> Yong Zhang<sup>c</sup>*

<sup>a</sup> Dr. S. Song, Prof. J. Wang, P. Rao

College of Chemistry and Chemical Engineering, Shanghai University of Engineering Science, Shanghai 201620, P. R. China

E-mail: polymer\_song@hotmail.com.

<sup>b</sup> Prof. H. Hou

Guangdong Provincial Key Laboratory of Construction and Detection in Tissue Engineering, School of Basic Medical Science, Southern Medical University, Guangdong, Guangzhou 510515, P. R. China.

<sup>c</sup> Prof. Y. Zhang

State Key Laboratory for Metal Matrix Composite Materials, School of Chemistry and Chemical Engineering, Shanghai Jiao Tong University, Shanghai 200240, P. R. China.

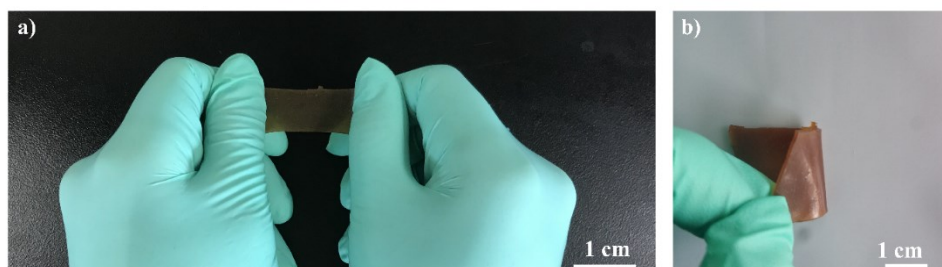

**Fig. S1.** a-b) Optical image of a BIIR-P $\alpha$ P film, which was obtained after the compressed blends.

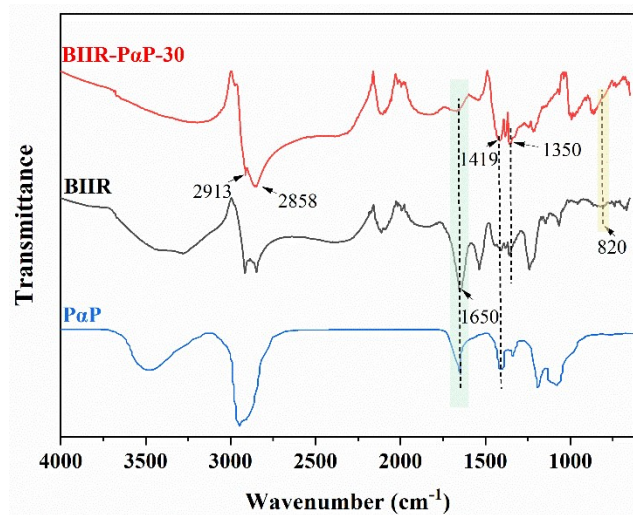

**Fig. S2.** FT-IR spectrum of the BIIR-PαP-30 composite, where the peaks correspond to -C-CH<sub>3</sub>/-C-CH<sub>2</sub>- stretching vibration at 2913 and 2885 cm<sup>-1</sup>, -CH<sub>2</sub>- bending vibration at 1419 and 1350 cm<sup>-1</sup>, respectively.

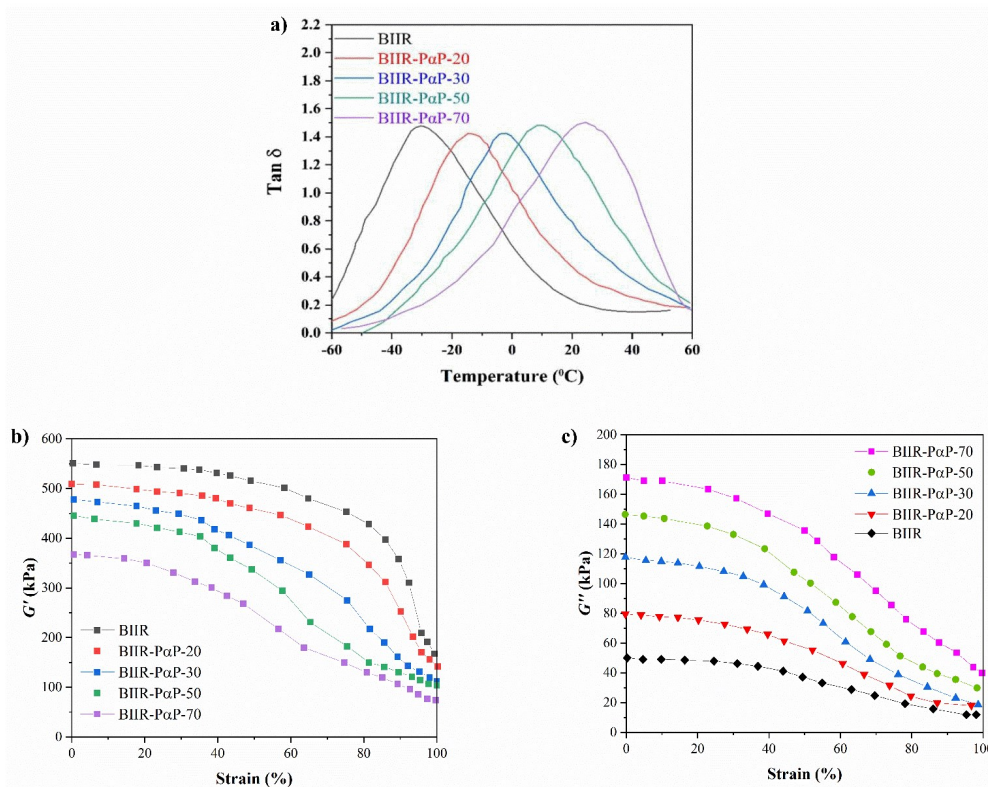

**Fig. S3.** a) Change of the loss factor ( $\tan \delta$ ) with temperature of BIIR and BIIR-PαP composites. The relationship curve of strain between with dynamic properties of the unvulcanized rubber compounds: b) the storage modulus ( $G'$ ) and c) the loss modulus ( $G''$ ) at 1Hz.

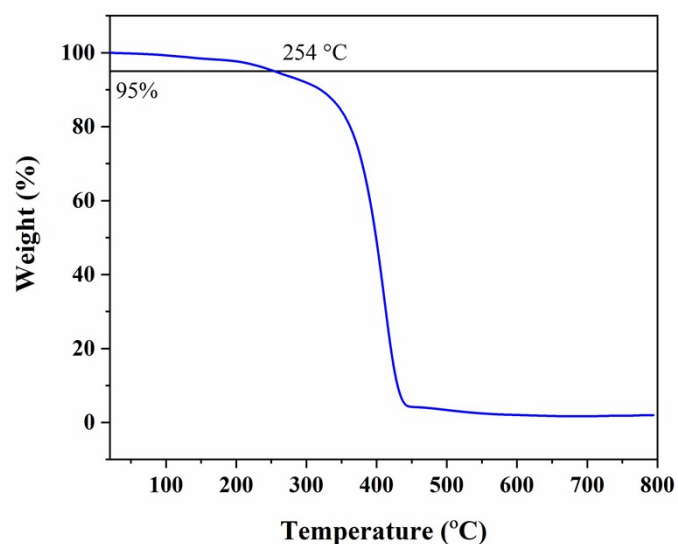

**Fig. S4.** TGA curve of BIIR-PαP-30 under nitrogen atmosphere at a heating speed of 10 °C/min.

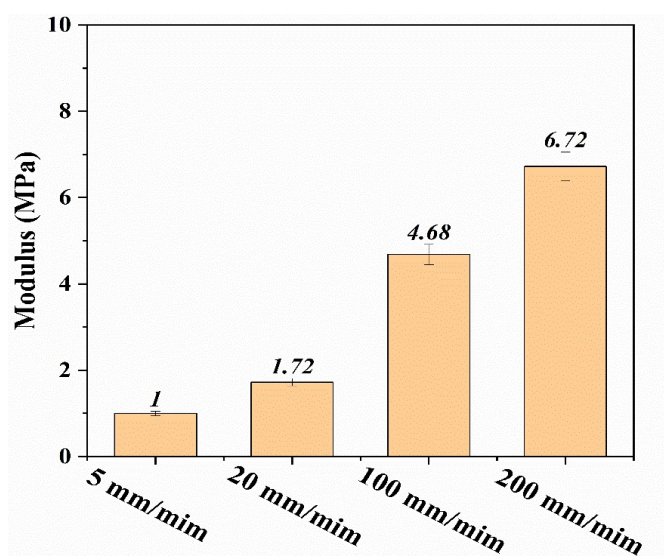

**Fig. S5.** Elastic modulus of BIIR-PαP-30 under different stretching rates.

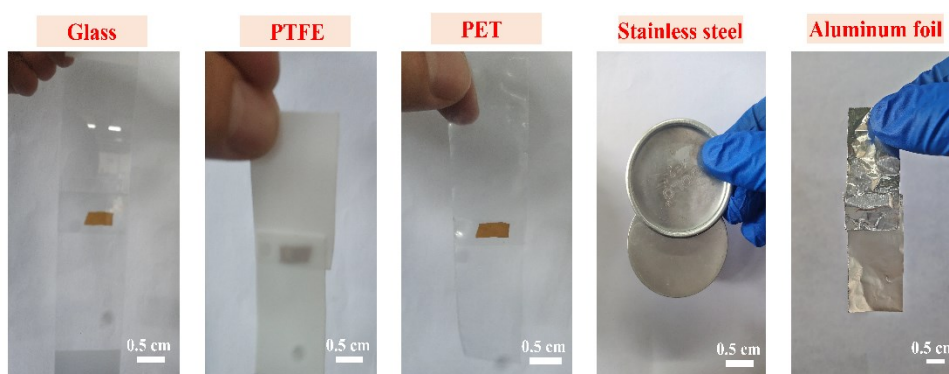

**Fig. S6.** Optical photos of a BIIR-PαP-30 film adhering to various representative substrates.

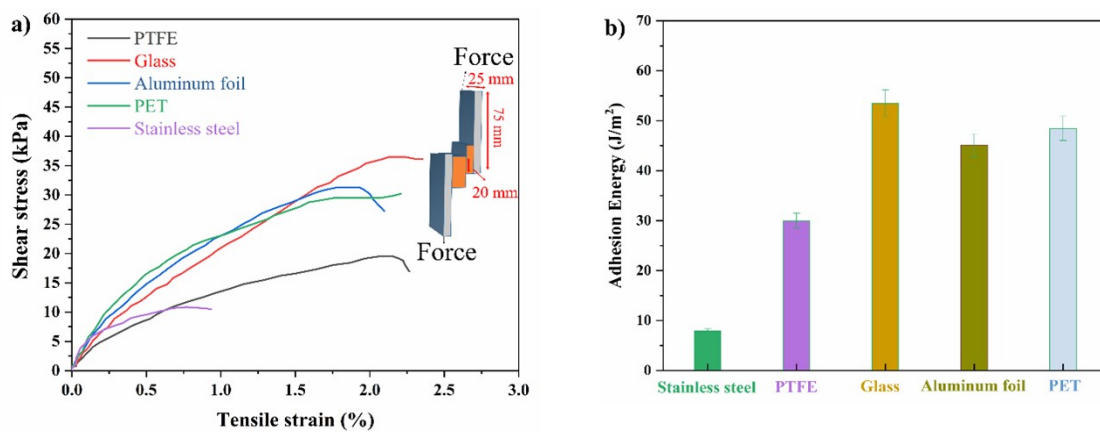

**Fig. S7.** a) Shear stress and b) adhesion energies of a BIIR-PαP-30 film adhering to a series of representative substrates.

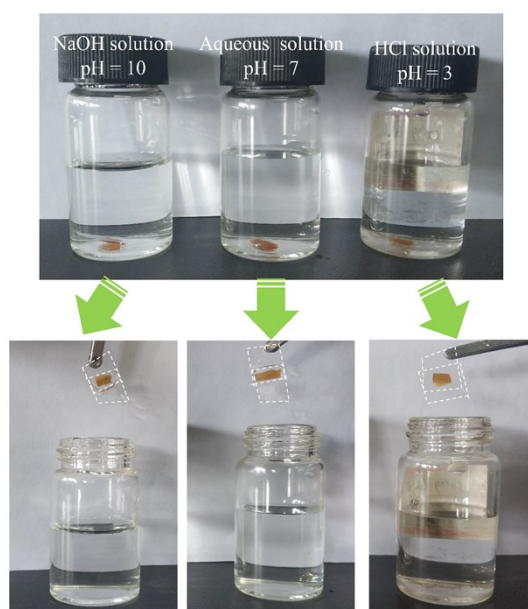

**Fig. S8.** Optical photos of a BIIR-PαP-30 film adhering to two pieces of glass, which were immersed in different pH solutions for 1d.

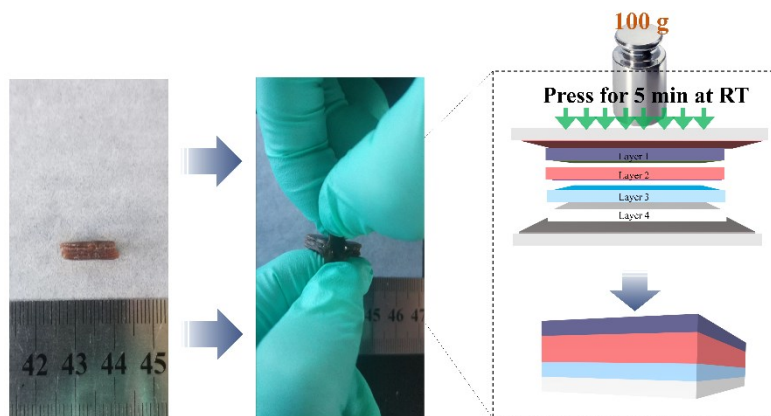

**Fig. S9.** Schematic diagram for separating of four pieces of BIIR-P $\alpha$ P-30 film after pressure ( $\approx$  10 KPa, 100 g weight/1cm<sup>2</sup> sample surface) of 5 min at room temperature.

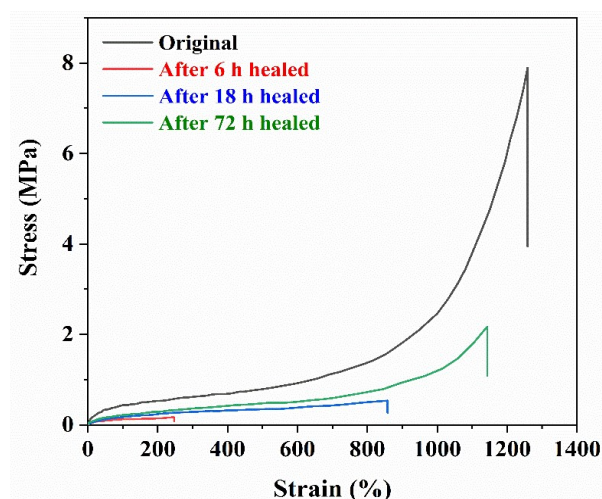

**Fig. S10.** Stress-strain curves of a BIIR-P $\alpha$ P-30 film healed at room temperature for different lengths of time.

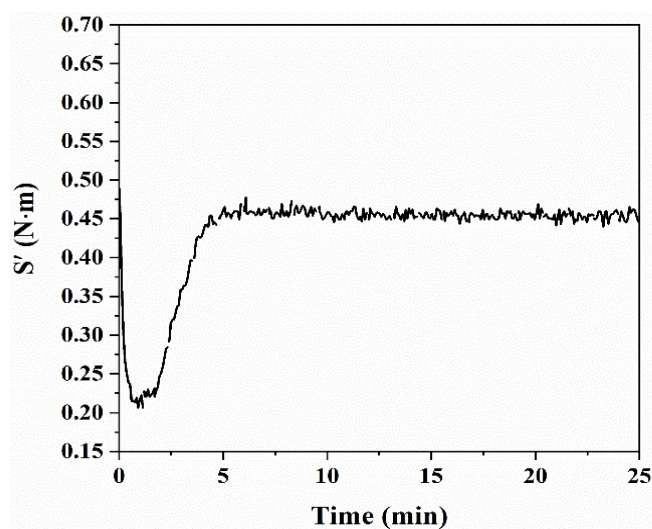

**Fig. S11.** The curing curve of the BIIR-P $\alpha$ P-30 composite.

**Table S1.** Summary of the mechanical properties of the various BIIR-PαP composites measured at a stretching speed of 20 mm min<sup>-1</sup>.

| Samples      | Weight ratio of BIIR and PαP | Ultimate tensile strength (MPa) | Elongation at break (%) | Toughness (MJ/m <sup>3</sup> ) |
|--------------|------------------------------|---------------------------------|-------------------------|--------------------------------|
| BIIR- PαP-20 | 80:20                        | 11.5±1.1                        | 980±23                  | 21.3                           |
| BIIR- PαP-30 | 70:30                        | 7.9±0.7                         | 1257±48                 | 21.5                           |
| BIIR- PαP-50 | 50:50                        | 5.0±0.4                         | 1716±71                 | 20.5                           |
| BIIR- PαP-70 | 30:70                        | 3.7±0.2                         | 1350±50                 | 8.1                            |

**Table S2.** The comparison of tensile strength, elongation at break, toughness and self-healing time of various self-healing polymers at room temperature.

| Samples                                             | Tensile strength (MPa) | Elongation at break (%) | Toughness (MJ/m <sup>3</sup> ) | Self-healing efficiency over 80% (h) | Ref      |
|-----------------------------------------------------|------------------------|-------------------------|--------------------------------|--------------------------------------|----------|
| Polybutadiene                                       | 0.4                    | 100                     | 0.25                           | 1 <sup>a</sup>                       | 1        |
| Polyurethane                                        | 1.6                    | 620                     | 4.5                            | 24                                   | 2        |
| Boronic ester network materials                     | 4                      | 53                      | 1.2                            | 72                                   | 3        |
| Polyacrylic acid (PAA)/polyvinylpyrrolidone (PVPON) | ~80                    | ~2.5                    | NA                             | 11 <sup>b</sup>                      | 4        |
| Poly(ethylene oxide)/pluronic F127 Hydrogel         | 0.25                   | 10650                   | 10.7                           | 24                                   | 5        |
| Disulfide bonds based polymers                      | 0.21                   | 100                     | 0.12                           | 24                                   | 6        |
| Bromobutyl rubber/terpene resin composites          | 3.8                    | 1156                    | 12.2                           | 72                                   | Our work |
|                                                     | 6.0                    | 1200                    | 16.67                          | 0.5 <sup>c</sup>                     |          |

<sup>a)</sup> Self-healed under a pressure of 20 kPa; <sup>b)</sup> Self-healed under immersion in water; <sup>c)</sup> Self-healed under pressure (≈10 kPa).

**Table S3.** Vulcanization parameters and crosslinking density of BIIR- PαP with different sulfur and PαP content.

| Samples           | Scorch time (s) | Optimum cure time (s) | Minimum torque (dN·m) | Maximum torque (dN·m) | Crosslinking density (10 <sup>-4</sup> mol/cm <sup>3</sup> ) |
|-------------------|-----------------|-----------------------|-----------------------|-----------------------|--------------------------------------------------------------|
| BIIR- PαP-20      | 254             | 1020                  | 0.35                  | 0.65                  | 1.843                                                        |
| BIIR- PαP-20(1.5) | 206             | 932                   | 0.52                  | 0.84                  | 1.911                                                        |
| BIIR- PαP-30      | 293             | 1207                  | 0.21                  | 0.45                  | 1.792                                                        |

**Table S4.** Curing formula of BIIR-PαP composites.

| Samples      | BIIR (phr) | PαP (phr) | ZnO (phr) | S (phr) | SA <sup>a</sup> (phr) | DM <sup>b</sup> (phr) | TMTD <sup>c</sup> (phr) |
|--------------|------------|-----------|-----------|---------|-----------------------|-----------------------|-------------------------|
| BIIR- PαP-20 | 80         | 20        | 3         | 1       | 1                     | 0.75                  | 0.25                    |
| BIIR- PαP-30 | 70         | 30        | 3         | 1       | 1                     | 0.75                  | 0.25                    |
| BIIR- PαP-50 | 50         | 50        | 3         | 1       | 1                     | 0.75                  | 0.25                    |
| BIIR- PαP-70 | 30         | 70        | 3         | 1       | 1                     | 0.75                  | 0.25                    |

<sup>a)</sup> Stearic acid; <sup>b)</sup> 2, 2'-dithiodibenzothiazole; <sup>c)</sup> Tetramethyl thiuram disulfide.

## References

1. Y. X. Lu and Z. Guan, *J. Am. Chem. Soc.*, 2012, **134**, 14226-14231.
2. X. An, R. H. Aguirresarobe, L. Irusta, F. Ruipérez, J. M. Matxain, X. Pan, N. Aramburu, D. Mecerreyes, H. Sardon and J. Zhu, *Polym. Chem.*, 2017, **8**, 3641-3646.
3. J. J. Cash, T. Kubo, A. P. Bapat and B. S. Sumerlin, *Macromolecules*, 2015, **48**, 2098-2106.
4. N. An, X. Wang, Y. Li, L. Zhang, Z. Lu and J. Sun, *Adv. Mater.*, 2019, **31**, e1904882.
5. P. Wang, G. Deng, L. Zhou, Z. Li and Y. Chen, *ACS Macro Lett.*, 2017, **6**, 881-886.
6. Z. Q. Lei, H. P. Xiang, Y. J. Yuan, M. Z. Rong and M. Q. Zhang, *Chem. Mater.*, 2014, **26**, 2038-2046.
